1 **Transparency reduces predator detection in chemically protected clearwing butterflies**

2

3 Mónica Arias<sup>1</sup>, Johanna Mappes<sup>2</sup>, Charlotte Desbois<sup>3</sup>, Swanne Gordon<sup>2</sup>, Melanie McClure<sup>3</sup>,

4 Marianne Elias<sup>3\*</sup>, Ossi Nokelainen<sup>2\*</sup>, Doris Gomez<sup>1,4\*</sup>

5

6 <sup>1</sup>CEFE, Univ Montpellier, Univ Paul Valéry Montpellier 3, EPHE, IRD, Montpellier, France

7 <sup>2</sup>Department of Biological and Environmental Science, Centre of Excellence in Biological  
8 Interactions, University of Jyväskylä, P.O. Box 35, 40014 Jyväskylä, Finland

9 <sup>3</sup>Institut de Systématique, Evolution, Biodiversité, UMR 7205, CNRS, MNHN, Sorbonne  
10 Université, EPHE, 45 rue Buffon CP50, France

11 <sup>4</sup>INSP, Sorbonne Université, CNRS, Paris, France

12

13 \*co-last authors

14 Correspondence author email: [moarias@gmail.com](mailto:moarias@gmail.com)

15

16 Keywords: aposematic, crypsis, detectability, Ithomiini, vision modelling, citizen science,  
17 bird, experiment

18

19 **Abstract**

20 1. Predation is an important selective pressure and some prey have evolved warning  
21 colour signals advertising unpalatability (i.e. aposematism) as an antipredator  
22 strategy. Unexpectedly, some butterfly species from the unpalatable tribe Ithomiini  
23 possess transparent wings, an adaptation rare on land but common in water where it  
24 helps avoiding predator detection.

- 25        2. We tested if transparency of butterfly wings was associated with decreased  
26        detectability by predators, by comparing four butterfly species exhibiting different  
27        degrees of transparency, ranging from fully opaque to largely transparent. We tested  
28        our prediction using using both wild birds and humans in behavioural experiments.  
29        Vision modelling predicted detectability to be similar for these two predator types.
- 30        3. In concordance with predictions, more transparent species were almost never the first  
31        detected items and were detected less often than the opaque species by both birds and  
32        humans, suggesting that transparency enhances crypsis. However, humans could learn  
33        to better detect the most transparent species over time. Our study demonstrates for the  
34        first time that transparency on land likely decreases detectability by visual predators.

## 35        **Introduction**

36        Predation is an important selective pressure and a strong evolutionary force shaping prey  
37        coloration. As a way to avoid predator detection, some prey have evolved colours and  
38        textures that mimic those of the background, hence rendering them cryptic (Endler, 1988). In  
39        midwater environments where there is nowhere to hide, crypsis can be achieved by different  
40        means, including transparency (Johnsen, 2014). Transparency is common in aquatic  
41        organisms where it has been shown to decrease detectability by visual predators, enabling  
42        prey to blend in with their environment (Kerfoot, 1982; Langsdale, 1993; Tsuda, Hiroaki, &  
43        Hirose, 1998; Zaret, 1972). By contrast, transparency is generally rare in terrestrial  
44        organisms, except for insect wings, which are made of chitin, a transparent material. The lack  
45        of pigments in these wings is sometimes accompanied by anti-reflective nanostructures that  
46        render them highly transparent, such as in cicadas and damselflies (Watson, Myhra, Cribb, &  
47        Watson, 2008; Yoshida, Motoyama, Kosaku, & Miyamoto, 1997). However, Lepidoptera  
48        (named after ancient Greek words for scale – *lepis* – and wing *-pteron*) are an exception as  
49        their wings are generally covered with colourful scales that are involved in intraspecific

50 communication (Jiggins C. D., Estrada C., & Rodrigues A., 2004), thermoregulation  
51 (Miaoulis & Heilman, 1998), water repellence (Wanasekara & Chalivendra, 2011), flight  
52 enhancement (Davis, Chi, Bradley, & Altizer, 2012), and antipredator strategies such as  
53 crypsis (Stevens & Cuthill, 2006), masquerade (Suzuki, Tomita, & Sezutsu, 2014) and  
54 aposematism (i.e. advertisement of unpalatability, Mallet & Singer, 1987).

55

56 Ithomiini (Nymphalidae: Danainae), also known as clearwing butterflies, are some of the  
57 most abundant butterflies in Neotropical forests (Willmott, Willmott, Elias, & Jiggins, 2017).  
58 They are thought to be unpalatable due to the accumulation of pyrrolizine alkaloids collected  
59 from Asteraceae, Boraginaceae and Apocynaceae plants (Brown, 1984, 1985). Many of these  
60 clearwing butterflies represent classic examples of aposematic prey, whereby bright colour  
61 patterns – often with orange, yellow and black - advertise their unprofitability to predators  
62 (Mappes, Marples, & Endler, 2005; Poulton, 1890). Bright contrasting and aposematic  
63 coloration is likely to be the ancestral state in the group, since sister lineages (Tellerveni and  
64 Danaini) are opaque and aposematic (Freitas & Brown, 2004). However, transparency has  
65 evolved to some degree in approximately 80% of clearwing butterfly species, even though  
66 many retain minor opaque and colourful wing elements (Beccaloni, 1997; Elias, Gompert,  
67 Jiggins, & Willmott, 2008; Jiggins, Mallarino, Willmott, & Bermingham, 2006). Since  
68 transparency is often associated with crypsis, for example in aquatic organisms (Johnsen,  
69 2014), transparency may have evolved in these butterflies to reduce their detectability by  
70 predators.

71

72 To determine if transparency in clearwing butterflies decreases detectability by visual  
73 predators, we compared predator detection of four Ithomiini species that differed in the  
74 amount of transparency of their wings (Fig S1): *Hypothesis ninonia* (largely opaque),

75 *Ceratinia tutia* (transparent but brightly coloured), *Ithomia salapia* (transparent with a pale  
76 yellow tint) and *Brevioleria seba* (transparent without colouration other than a white band in  
77 the forewing). Given the proportion of light that is transmitted through the butterfly wing of  
78 the different species (Fig S2), we predicted that the opaque species *Hypothyris ninonia*  
79 should be easiest to detect, followed by the transparent but coloured *Ceratinia tutia*. Finally,  
80 the more transparent butterfly species *Ithomia salapia* and *Brevioleria seba* should be the  
81 least detectable. We tested our predictions using two complementary behavioural  
82 experiments, further supported by a vision modelling approach.

83

84 Detectability of butterflies was first tested using wild great tits (*Parus major*) as model bird  
85 predators. Great tits are highly sensitive to UV wavelengths (UVS vision in Ödeen, Håstad,  
86 & Alström, 2011). Their vision is similar to that of naturally occurring Ithomiini predators  
87 like the houtouc motmot (*Momotus momota*, Pinheiro, Medri, & Salcedo, 2008), the fawn-  
88 breasted tanager (*Pipraeidea melanonota*, (Brown & Neto, 1976) or the rufous-tailed tanager  
89 (*Ramphocelus carbo* (Brower, Brower, & Collins, 1963). However, great tits are naïve to  
90 ithomiine butterflies and they do not associate their colour patterns to toxicity. As bird  
91 responses are the result of both prey detection and motivation to attack the prey, we  
92 performed behavioural experiments using human participants, which can prove to be useful  
93 in disentangling these two factors. Despite differences in colour perception between humans  
94 and birds (both of which are visual predators), humans have been found to be good predictors  
95 of prey survival in the wild (Penney, Hassall, Skevington, Abbott, & Sherratt, 2012). Finally,  
96 models of predator vision (both for birds and humans) were used to complement behavioural  
97 experiments and infer the relative detectability of each butterfly species based on their  
98 contrast against the background.

## 99 **Materials and Methods**

100 **Butterflies used for the behavioural experiments**

101 Specimens of the four Ithomiini species used in both experiments – which, in order of  
102 increasing transparency are *Hypothyris ninonia*, *Ceratinia tutia*, *Ithomia salapia aquina*,  
103 *Brevioleria seba* (see Figs S1, S2) – were collected in Peru in 2016 and 2017, along the  
104 Yurimaguas - Moyobamba road (-6.45°, -76.30°). Butterflies were kept dry in glassine  
105 envelopes until use. In behavioural experiments, a single real hindwing and a single real  
106 forewing were assembled into artificial butterflies using glue and a thin copper wire to attach  
107 the artificial butterfly to a substrate (see Fig S3 for an example). These artificial butterflies  
108 mimicked real Ithomiini butterflies at rest, with wings closed and sitting on plant leaves (a  
109 typical posture for resting butterflies).

110 **Behavioural experiments using wild birds**

111 Behavioural experiments took place in August and September 2017 at the Konnevesi  
112 Research Station (Finland) under permit from the National Animal Experiment Board  
113 (ESAVI/9114/04.10.07/2014) and the Central Finland Regional Environment Centre  
114 (VARELY/294/2015). Thirty wild-caught great tits (*Parus major*) were used, including 3  
115 juvenile and 10 adult females, and 8 juvenile and 9 adult males. Birds were caught using  
116 spring-traps and mist-nets, individually marked with a leg band and used only once. Each  
117 bird was kept individually in an indoor cage (65x65x80 cm), with a 12:12 photoperiod. Birds  
118 were fed with peanuts, sunflower seeds, oat flakes and water *ad libitum*, except during  
119 training and experiments. During training, birds were given mealworms (see Training  
120 section). Birds were deprived of food for up to 2 hours before the experiment to increase their  
121 motivation. Most birds were kept in captivity for less than a week, after which they were  
122 released at their capture site.

123

124 *Training.* In their indoor cage, birds were taught that all four species of butterflies were  
125 similarly palatable by offering them wings of four butterflies (one of each species) with a  
126 mealworm attached to the copper wire. Butterfly wings used for training were laminated with  
127 transparent thin plastic to minimize damage so that these wings could be re-used when  
128 possible. As birds typically do not consume butterfly wings but only butterfly body (here  
129 dead mealworm), wing toxicity or unpalatability did not influence their training. Butterflies  
130 were presented to the birds in the absence of any vegetation during training. When birds had  
131 eaten all four prey items (one of each species), a new set was presented. Training ended when  
132 birds had eaten 3 sets of butterflies. No time constraint was imposed for training and most  
133 birds completed it in less than 4 hours.

134

135 In order to familiarise birds with the experimental set-up, which was novel to them, they were  
136 released in the experimental cage by groups of two to four birds for approximately one hour  
137 the day before the experiment. Oat flakes, seeds and mealworms were dispersed over leaves  
138 and vegetation to encourage searching for edible items in locations similar to where  
139 butterflies would be placed during the experiment.

140

141 *Experiments.* The experimental set-up consisted of a 10m x 10m cage that had tarpaulin walls  
142 and a ceiling of whitish dense net that let in natural sunlight. Butterflies were disposed in a 5  
143 x 5 grid, delimited by poles all around the borders and a rope defining rows and columns (see  
144 Fig S4). Two extra poles were placed in the grid centre to increase the appeal of this area for  
145 birds. Five specimens of each species (20 specimens in total) were placed in the grid, one per  
146 cell, following a block randomization for each row and column and ensuring that all species  
147 were evenly represented along the grid. This random configuration was reshuffled between  
148 trials (i.e. randomized block design). The 5 cells closest to the observer were left empty as

149 birds tended to avoid this area. For each trial, an observer, hidden to the birds, watched from  
150 outside the cage through a small window and took notes of which butterfly species were  
151 attacked and in which order. A GoPro camera also recorded the experiments. A butterfly was  
152 considered detected only if a bird directly approached it to grab, including when the attack  
153 failed. No bird was seen hesitating the attack once it started it. Experiments took place  
154 between 9 am and 5 pm. Before each trial, the radiance of ambient light (coming from the sun  
155 and sky) was measured using an Ocean Optics spectrophotometer in the same location each  
156 time. We computed the total radiance (TR) over the range of 300-700 nm of bird spectral  
157 sensitivity to account in statistical analyses for the level of ambient light intensity associated  
158 to each experimental trial. Further information on weather conditions (cloudy, sunny, etc)  
159 were also noted. Experiments ended when a bird had eaten half of the available butterflies (ie.  
160 10 butterflies) or after 2 hours, whichever happened first. Wings were occasionally re-used if  
161 they had not been damaged.

162

163 After the experiment, the probability of a bird being present in a given grid cell was  
164 calculated as a proxy for the probability of an attack occurring in that grid cell. To do so, 10-  
165 minute intervals from each recording, selected based either on the maximum attack rate or  
166 when the bird was seen actively exploring the cage, were revised so as to calculate the  
167 proportion of time birds spent on poles situated next to each cell. A total of 87% of all attacks  
168 started from the pole closest to the grid cell, while all other attacks were initiated from a pole  
169 situated only one grid cell further away. Thus, the probability of visiting a given cell was the  
170 sum of the time spent on each neighbouring pole, divided by the number of either “close”  
171 (immediately next to) or “distant” (one grid cell removed) neighbouring cells and multiplied  
172 by either 0.87 or 0.13 (depending on the distance to the pole). As such, those cells closest to  
173 the poles and those at the edge of the cage were most likely to be visited by birds.

174

175 *Statistical analyses.* Differences in the total number of butterflies of each species that were  
176 attacked were compared by fitting generalised linear mixed effect models (GLMM), with bird  
177 identity as a random factor. A binomial distribution was used for the response variable  
178 (attacked or not), and the butterfly species, butterfly size, the probability of being attacked for  
179 a given cell, trial duration, age and sex of the bird, time to first attack, first butterfly species  
180 found, weather (as a qualitative variable), and total radiance (TR) were all selected as  
181 explanatory variables. The best fitting model was selected based on minimization of Akaike's  
182 Information Criteria (AIC), assuming that models differing by two units or less were  
183 statistically indistinguishable (Anderson, Burnham, & White, 1998). Coefficients and  
184 standard errors were computed using a restricted maximum likelihood approach and a Wald z  
185 test was used to test for factor significance.

186

187 Most birds fed willingly on all butterflies located on the borders of the grid. Given that  
188 butterfly species distribution was random and reshuffled between trials, the four species were  
189 similarly represented in those cells (Fig S5), so no bias was expected. The order of attack for  
190 each species was tested by ranking the "inconspicuousness" of each butterfly species based  
191 on the order in which butterflies were found and how many of them were detected (Ihalainen,  
192 Rowland, Speed, Ruxton, & Mappes, 2012). To do so, the position of each butterfly that was  
193 attacked for each species and the total number of non-attacked butterflies of each species  
194 multiplied by 11 (i.e. the maximum number of butterflies that could be found + 1) were  
195 added. This inconspicuousness rank distinguishes between those species found first and in  
196 higher numbers (lower values of inconspicuousness) from those found last and in lower  
197 numbers (higher values of inconspicuousness). For example, if a bird captured two *H.*  
198 *ninonia* second and fifth in the sequence of captured prey, this species gets a rank value of



199  $2+5+3 \times 11=40$  for that trial. We fitted a linear mixed effect model to test for differences in  
200 rank for each species, assuming a normal distribution, with rank as the response variable, bird  
201 individual as a random factor and butterfly species, age and sex of the bird, date, time until  
202 first attack, first butterfly species found, weather as a qualitative variable, and total radiance  
203 (TR) as explanatory variables. Again, the best fitting model was selected using AIC  
204 minimization.

205

206 We also tested whether differences in the rank of species inconspicuousness could be due to a  
207 differential attack probability for each species, i.e. whether species more likely to be attacked  
208 were more often placed on cells more likely to be visited. To do so, the probability of a bird  
209 being in proximity to a grid cell containing one of the five artificial butterflies of each species  
210 was averaged for each trial. An ANOVA was then used to compare the probability of attack  
211 for each butterfly species.

212

213 Finally, to test whether birds created a “search image” (i.e. improved in finding butterflies of  
214 a given species), the number of butterflies of each species found consecutively was counted.  
215 Results were compared among butterfly species using a  $\chi^2$  test. Additionally, whether finding  
216 some species improved the bird’s ability to find others was tested. For each combination of  
217 two species, we calculated how many times a butterfly of species 1 was found after a  
218 butterfly of species 2. Differences between them were tested using a  $\chi^2$  test. All analyses were  
219 performed in R (R Foundation for Statistical Computing, 2014).

220

## 221 **Behavioural experiments using human participants**

222 Between mid-November and early December 2017, visitors of the Montpellier botanical  
223 garden (France) were invited to take part in an experiment where they searched for artificial

224 butterflies. Before each trial, participants were shown pictures of various ithomiine  
225 butterflies, both transparent and opaque, but of species different than those used in the  
226 experiments, so as to familiarize them with what they would be searching for. Anonymous  
227 personal data was collected from each participant, including gender, age group (A1: <10  
228 years, A2: 11-20 y, A3: 21-30 y, A4: 31-40 y, A5: 41-50 y and A6: >51 years), and vision  
229 problems. A participant did the experiment only once.

230

231 *Experimental set-up.* Artificial butterflies (N=10 of each of the four species, for a total of 40  
232 butterflies) again consisted of one forewing and one hindwing assembled with copper wire  
233 and placed on leaves, but without the mealworm used in the bird experiments. These  
234 butterflies were set-up along two corridors in a forest-like understory habitat of similar  
235 vegetation and light conditions. Butterfly order followed a block randomisation, with five  
236 blocks each consisting of eight butterflies (i.e. two per species). This ensured that observers  
237 were similarly exposed to the four species all throughout the experimental transect. Whether  
238 a butterfly was placed on the left or right side of the corridor was also randomised. Both order  
239 and corridor side were changed daily. Participants could start the path from either end of the  
240 set-up and were given unlimited time to complete the trial. However, they could only move  
241 forward on the path. Only one participant was allowed in the path at any given time, and they  
242 were accompanied by an observer who recorded which butterflies were found. Trials ended  
243 when the participant had completed both corridors.

244

245 *Statistical analyses.* Differences in the total number of butterflies found for each species was  
246 tested by fitting GLMMs. A binomial distribution for the response variable (either found or  
247 not) was assumed, and participant identity was set as a random factor, butterfly species, first  
248 species found, butterfly position, corridor, left or right side of the path, time of day, gender

249 and age of the participant, duration of the experiment, and their interactions, were all used as  
250 explanatory variables. A minimization of Akaike's Information Criteria (AIC) was used to  
251 select the best model, assuming that models differing by two units or less were statistically  
252 indistinguishable (Anderson et al., 1998). Coefficients and standard errors were computed  
253 using a restricted maximum likelihood approach and a Wald z test was used to test for factor  
254 significance. Whether specific species were more frequently detected was also tested using a  
255  $\chi^2$  test. Similarly as for the experiments using birds, a GLMM was also fitted under the same  
256 conditions, but using the butterfly species inconspicuousness rank (similarly calculated as for  
257 the bird experiments) as a response variable.

258

259 Finally, whether humans found several butterflies of the same species consecutively (perhaps  
260 because they formed a "species search image") was also tested. A  $\chi^2$  test was used to compare  
261 the number of butterflies of each species that were found consecutively. Whether finding  
262 individuals of a species increased the likelihood of finding other species was also tested. For  
263 each combination of two species, we calculated how many times a butterfly of the first  
264 species was found immediately after a butterfly of a second species. Differences between the  
265 frequencies of these combinations were tested using a  $\chi^2$  test, comparing observed results and  
266 the frequency at which each possible pair of species was placed consecutively in the original  
267 experimental setup. All analyses were performed in R (R Foundation for Statistical  
268 Computing, 2014).

269

270 Colour measurements and vision modelling can be found in electronic supplementary  
271 material (additional materials and methods).

## 272 **Results**

### 273 **Behavioural experiments using wild birds**

274 Birds took anywhere between 1 and 37 minutes (average:  $7.54 \pm 8.96$  min) after release into  
275 the experimental cage before initiating an attack. For three of the birds, the experiment ended  
276 without having eaten 10 butterflies in the allocated 2 hours. The other 27 birds took between  
277 11 and 112 minutes to attack 10 butterflies (mean time to attack 10 butterflies:  $40.76 \pm 26.23$   
278 min). Considering all trials, similar percentages of butterflies for each species was found by  
279 birds (54% of *H. ninonia* butterflies (the most colourful species), 48.7% for *C. tutia*  
280 (colourful but transparent species), 46.7% for *I. salapia* (yellow-tinted butterfly) and 49.3%  
281 of *B. seba* butterflies (most transparent species).

282

283 The model that best explained whether butterflies were attacked or not only included the  
284 probability of occupancy of a given grid cell by a bird, time of the first attacked and the grid  
285 cell occupied by the butterfly (AIC = 610.42, Delta AIC = 4.8142 with a model that  
286 additionally included butterfly species, Table S1). Butterflies were more likely to be attacked  
287 where birds visited most often ( $z = 2.93$ ,  $p = 0.003$ ). By contrast, the inconspicuousness rank of  
288 a butterfly species was best explained by a model including average probability of occupancy  
289 by a bird and butterfly species as explanatory variables (AIC = 765.73, Delta AIC = 2.53 with  
290 a model including the species that was attacked first, Table S2). *H. ninonia*, which was the  
291 most colourful species, was usually detected in the first prey attacked ( $t = -3.15$ , Fig 1a, Table  
292 S2). Moreover, which species were found first closely matched their transmission properties:  
293 *H. ninonia*, followed by *C. tutia*, *I. salapia* and *B. seba* ( $X^2 = 11.07$ ,  $df = 3$ ,  $p = 0.011$ , Table  
294 S3). When comparing species distribution along the grid, artificial butterflies that were  
295 attacked were in grid cells with moderate to high bird occupancy rate ( $F = 0.82$ ,  $df = 3$ ,  $p =$   
296  $0.485$ , Fig S5).

297

298 Generally, birds did not find several butterflies of the same species consecutively (Fig S6a).  
299 In the rare instances that they did, no differences between species was found ( $X^2 = 0.6$ ,  $df = 3$ ,  
300  $p = 0.90$ ) suggesting that birds did not form a “search image” for any of the butterfly species.  
301 No combination of species was attacked consecutively at high frequencies either ( $X^2 = 10.88$ ,  
302  $df = 11$ ,  $p = 0.45$ ).

303

#### 304 **Behavioural experiments using human participants**

305 A total of 102 volunteers participated in the experiment (63 men and 39 women, with  
306 10:11:21:18:31:11 in the A1:A2:A3:A4:A5:A6 age classes). 19 volunteers ran the experiment  
307 before 13h30, 35 between 13h30 and 16h, and 48 after 16h. Participants found between 5 and  
308 28 of the 40 butterflies ( $12.75 \pm 4.68$  butterflies found per participant) and took between 7.5  
309 and 37 minutes to walk both corridors ( $18.04 \pm 6.5$  minutes spent in average per participant).  
310 For all trials combined, participants found 42.5% of *H. ninonia* butterflies (the most colourful  
311 species), 38% of *C. tutia* (colourful but transparent species), 23.54% of *I. salapia* (yellow-  
312 tinted butterfly) and 28.63% of *B. seba* butterflies (most transparent species).

313

314 Younger participants found more butterflies than older ones (number of butterflies:  $z = -2.34$ ;  
315 butterfly species rank:  $t = -1.36$ ). Additionally, participants found more butterflies earlier  
316 than later in the afternoon (number of butterflies:  $z = -2.80$ ; inconspicuousness rank:  $t = -$   
317  $1.77$ ). However, this was most significant for younger participants (inconspicuousness rank:  $t$   
318  $= 1.32$ , Fig S7a). Generally the more time participants spent in the experiment, the higher the  
319 number of butterflies they found (number of butterflies:  $z = 5.21$ ; inconspicuousness rank:  $t =$   
320  $4.03$ ), although this was most significant for women (number of butterflies:  $z = -2.96$ ,  
321 inconspicuousness rank:  $-2.83$ , Fig S7b). There was a corridor effect, likely due to differences  
322 in the overall cover of vegetation (number of butterflies:  $z = 3.14$ ; inconspicuousness rank:  $t$

323 = -3.52). Participants also found more butterflies at the end rather than at the start of the  
324 experiment (number of butterflies:  $z = 5.21$ ; inconspicuousness rank:  $t = 4.03$ , Tables S3 and  
325 S4), most likely because they became accustomed to the set-up and what they were searching  
326 for.

327

328 The inconspicuousness rank of butterfly species was affected by time of day and the day of  
329 the experiment (Fig 1b, Table S5). Species rank was highest earlier in the day ( $t = -1.77$ ).  
330 Moreover, older participants omitted fewer butterflies at later hours ( $t = 1.32$ ).

331

332 Participants were more likely to find opaque butterflies than transparent ones, following the  
333 order *H. ninonia* (H), *C. tutia* (C), *B. seba* (B) and *I. salapia* (I) (H>C, I, B: number of  
334 butterflies:  $z = 5.73$ ; inconspicuousness rank:  $t = -7.11$ ; C>B: number of butterflies:  $z = 0.03$ ;  
335 inconspicuousness rank:  $t = -1.65$ ; B>I: number of butterflies:  $z = 2.37$ , Table S4;  
336 inconspicuousness rank:  $t = 2.68$ , Fig 1b). However, the gain in detection with increasing  
337 time spent searching was highest for the most transparent species ( $z = -2.75$ , Fig 2, Fig S7).  
338 *H. ninonia* was also the species most frequently found first, followed by *C. tutia*, *B. seba* and  
339 *I. salapia* ( $X^2 = 19.5$ ,  $df = 3$ ,  $p < 0.001$ , Table S3).

340

341 Differences were also found in the consecutive order in which butterflies were found.  
342 Participants were more likely to find two consecutive butterflies of the same species when  
343 they were colourful (*H. ninonia* -50 times- and *C. tutia* -58 times) than when they were  
344 transparent (*B. seba* -32 times- or *I. salapia* -18 times;  $X^2 = 29.14$ ,  $df = 3$ ,  $p < 0.001$ ). *B. seba*  
345 and *H. ninonia* were found up to four consecutive times in a single trial. Some species were  
346 also more likely to be found consecutively after another species. The most opaque butterflies  
347 *H. ninonia* and *C. tutia* (found 278 times consecutively), and the transparent species *B. seba*

348 and *I. salapia* (found 186 times consecutively), were found consecutively more frequently  
349 than any of the other possible combinations after correcting for the number of butterflies  
350 found for each species ( $X^2 = 170.95$ ,  $df = 5$ ,  $p < 0.001$ ). These observed frequencies  
351 significantly differed from the position that butterflies occupied on the original set-up along  
352 the path ( $X^2 = 79.12$ ,  $df = 11$ ,  $p < 0.001$ , Fig S6b).

353

### 354 **Models of bird and human vision**

355 The achromatic weighted contrast between butterfly colour patches and green-leaf  
356 background were similar for both birds and humans (mean achromatic contrast for birds:  
357  $H=3.81$ ,  $C= 3.15$ ,  $I=2.31$ ,  $B=2.11$ ; for humans:  $H=5.25$ ,  $C=4.35$ ,  $I=3.58$ ,  $B=3.86$ . Fig S8). For  
358 both observers, *H. ninonia* followed by *C. tutia* (colourful and transparent butterfly)  
359 contrasted the most against the leaves, while transparent butterflies (*I. salapia* for humans  
360 and *B. seba* for birds), were the least contrasting. Butterflies seem to be more chromatically  
361 detectable by birds than for humans (mean chromatic contrast for humans:  $H = 0.44$ ,  $C =$   
362  $0.37$ ,  $I = 0.25$ ,  $B = 0.22$ ). For the chromatic contrast seen by birds, *C. tutia*, and then *H.*  
363 *ninona* was the most contrasting, whereas *B. seba* and finally *I. salapia* were the least (mean  
364 chromatic contrast for birds:  $H = 2.02$ ,  $C = 2.05$ ,  $I = 1.30$ ,  $B = 1.38$ ).

### 365 **Discussion**

#### 366 **Transparency reduces detectability**

367 As initially predicted based on wing transmittance, and as demonstrated by our behavioural  
368 experiments and visual modelling results, transparency decreases butterfly detectability.  
369 Interestingly, detection by human participants was similar to naïve birds, as has been shown  
370 in other studies (Beatty, Bain, & Sherratt, 2005; Sherratt, Whissell, Webster, & Kikuchi,  
371 2015), providing further support to using human participants to measure predator detection.  
372 Surprisingly, experimental results from the bird experiments differed slightly from

373 predictions made based on the measures of transmittance of transparent patches and results  
374 obtained from the vision models. For instance, according to the transmittance and the  
375 chromatic contrast measured between butterflies and their background, birds should have  
376 probably detect *C. tutia* more easily than the two more transparent species. Indeed, semi-  
377 transparent objects should be more easily detected than fully transparent objects at short  
378 distances and when more light is available (Johnsen & Widder, 1998), such as experimental  
379 conditions present during bird experiments. Yet this transparent but brightly coloured species  
380 was detected at similar rates as the most transparent species. One possible explanation is that  
381 this species possesses disruptive colouration; indeed, wing contours of this species are less  
382 strongly delimited than that of the other species and a disrupted outline may hamper detection  
383 (Honma, Mappes, & Valkonen, 2015; Stevens & Cuthill, 2006). These contradicting results  
384 highlight the importance of combining both modelling and behavioural experiments to better  
385 understand the evolution of transparency and other prey defences.

386

### 387 **Transparency in a toxic butterfly?**

388 Our results demonstrate that transparency can effectively reduce prey detectability in  
389 chemically-protected ithomiine butterflies. This is surprising as aposematic colour patterns,  
390 rather than inconspicuousness, are more common in toxic and unpalatable prey (Mappes et  
391 al., 2005; Poulton, 1890; Ruxton, Sherratt, & Speed, 2004). In fact, conspicuousness is often  
392 positively correlated with toxicity or unpalatability and can thus be an honest indicator of  
393 prey defences (Arenas, Walter, & Stevens, 2015; Blount, Speed, Ruxton, & Stephens, 2009;  
394 Maan & Cummings, 2012; Prudic, Skemp, & Papaj, 2007; Sherratt & Beatty, 2003), and  
395 predators learn faster to avoid unpalatable prey when colours are more conspicuous  
396 (Gittleman & Harvey, 1980; Lindstrom, Alatalo, Mappes, Riipi, & Vertainen, 1999). This  
397 might suggest that the evolution of transparency in these butterflies is the result of a loss in



398 unpalatability. If this is the case, the existence of mimicry rings of transparent clearwing  
399 butterflies remains unexplained, as this is usually the result of convergence of warning  
400 signals promoted by the positive frequency-dependent selection exerted by predators  
401 (Willmott et al., 2017). Alternatively, if defences are costly, prey may invest in either visual  
402 or chemical defences (Darst, Cummings, & Cannatella, 2006; Speed & Ruxton, 2007; Wang,  
403 2011). Such strategies have been shown to afford equivalent avoidance by predators (Darst et  
404 al., 2006). Transparency may therefore be associated with an increase in unpalatability.  
405 Unfortunately, the relationship between transparency and the degree of chemical defences in  
406 clearwing butterflies is yet unknown.

407

408 Alternatively, transparency may lower detection and function as a primary defence, with  
409 aposematism taking over as a secondary defence if the prey is detected. Indeed, transparent  
410 butterflies were not completely cryptic for either birds or humans. In fact, birds found a  
411 similar number of both colourful and transparent butterflies, and humans appear to learn to  
412 detect and perhaps remember common elements between the more transparent species, what  
413 might be the result of a search image. As such, Ithomiini butterflies may be cryptic from afar,  
414 but perceived as conspicuous from up close (Gamberale-Stille, Bragee, & Tullberg, 2009;  
415 Tullberg, Merilaita, & Wiklund, 2005). A dual strategy of crypsis and conspicuousness has  
416 been described for other prey, including defended prey (Järvi, Sillén-Tullberg, & Wiklund,  
417 1981; Kang, Zahiri, & Sherratt, 2017; Sillén-Tullberg, 1985) For example, toxic salamanders  
418 of the genus *Taricha* are generally cryptic, only revealing their warning coloured underbelly  
419 when threatened (Johnson & Brodie Jr, 1975). In Ithomiini, conspicuous (or potentially  
420 conspicuous) elements can be found on even transparent species, and most species possess  
421 opaque areas delineating the edges and contrasting with the background, most likely  
422 increasing detection (Stevens & Cuthill, 2006). This, combined with our results and the

423 occurrence of co-mimics in natural populations, suggests that these butterflies may reduce the  
424 cost of conspicuousness using transparency in addition to maintaining the benefits of  
425 detectable warning signals. Behavioural experiments testing the distance at which Ithomiini  
426 butterflies are detected are needed to shed further light on the function of aposematism in less  
427 conspicuous prey.

428

429 Finally, transparency may have evolved as an additional primary protection against birds  
430 such as adult kingbirds (*Tyrannus melancholicus*, C. E. G. Pinheiro, 1996) which are able to  
431 tolerate their chemical defences. Indeed, both models (Endler & Mappes, 2004) and  
432 experiments (Mappes, Kokko, Ojala, & Lindström, 2014; Valkonen et al., 2012) have shown  
433 that weak warning signals (not overtly conspicuous) can evolve and be maintained in  
434 communities where predators vary in their probability of attacking defended prey. Larvae of  
435 *Dryas julia* butterflies, pine sawfly larvae (*Neodiprion sertifer* for example), and shield bugs  
436 (Acanthosomatidae, Heteroptera) are some of the several examples of unpalatable species  
437 that display weak visual warning signals (see Endler & Mappes, 2004). Similar to the  
438 polymorphic poison frog *Oophaga granulifera*, clearwing species may reflect a continuum  
439 between aposematic and cryptic strategies, possibly shaped by differences in the strength of  
440 predator selection as a result of the frequency of naïve predators and/or the variation in  
441 predator sensitivities to chemical compounds (Willink, Brenes-Mora, Bolaños, & Pröhl,  
442 2013). A thorough characterization of unpalatability, microhabitat and predator communities  
443 would be useful in better understanding conditions that promote the evolution of transparency  
444 in Ithomiini.

445

446 **Conclusions**

447 Our study, combining behavioural experiments with different predators and vision modelling,  
448 provides comparative insights into the complex role transparency may play in anti-predator  
449 defences of aposematic organisms. We show for the first time that transparency is an  
450 effective strategy for the reduction of detectability of terrestrial prey. We also demonstrate  
451 that Ithomiini butterflies may in fact be decreasing the costs of conspicuousness, while still  
452 retaining visual elements that are recognised as warning signals. Future studies exploring the  
453 efficiency of combining transparency and warning signals in decreasing predation risk will  
454 further contribute to understanding the evolution of cryptic elements in aposematic prey.

#### 455 **Acknowledgments**

456 We thank Tuuli Salmi and Tiffanie Kortenhoff for their invaluable help with behavioural  
457 experiments, Helinä Nisu for her advice on bird care, SERFOR, Proyecto Huallaga and  
458 Gerardo Lamas for providing research permits in Peru (collecting and exportation permit  
459 002-2015-SERFOR-DGGSPFFS), as well as Corentin Clerc, Monica Monllor, Alexandre  
460 Toporov and Marc Toporov-Elias for help with collecting butterflies used in this study,  
461 Céline Houssin for Ithomiini pictures and calculation of wing surfaces for each patch,  
462 Konnevesi Research Station which provided the facilities used for bird experiments, and  
463 visitors to Montpellier botanical garden for their enthusiastic contribution. The Academy of  
464 Finland to JM, SG and ON (Grants 2100000256 and 21000038821), the Clearwing ANR  
465 program (ANR-16-CE02-0012) and the Human Frontier Science Program grant (RGP  
466 0014/2016) fund the study.

467

#### 468 **Author contribution**

469 DG, ME, JM and MA designed the study; ME, MM and DG collected the butterfly samples;  
470 MA, SG, ON, ME and JM did the experiments; DG and CD took the optical measurements;

471 MA, DG and ME analysed the data; MA, DG, MM, ME, ON, SG and JM wrote the  
472 manuscript.

473

#### 474 **References**

- 475 Anderson, D., Burnham, K., & White, G. (1998). Comparison of Akaike information criterion and  
476 consistent Akaike information criterion for model selection and statistical inference from  
477 capture-recapture studies. *Journal of Applied Statistics*, 25(2), 263–282.
- 478 Arenas, L. M., Walter, D., & Stevens, M. (2015). Signal honesty and predation risk among a closely  
479 related group of aposematic species. *Scientific Reports*, 5.
- 480 Beatty, C. D., Bain, R. S., & Sherratt, T. N. (2005). The evolution of aggregation in profitable and  
481 unprofitable prey. *Animal Behaviour*, 70(1), 199–208.
- 482 Beccaloni, G. (1997). Ecology, natural history and behaviour of the Ithomiinae Butterflies and their  
483 mimics in Ecuador. *Tropical Lepidoptera*, 8, 103–124.
- 484 Blount, J. D., Speed, M. P., Ruxton, G. D., & Stephens, P. A. (2009). Warning displays may function  
485 as honest signals of toxicity. *Proceedings of the Royal Society of London B: Biological*  
486 *Sciences*, 276(1658), 871–877. doi:10.1098/rspb.2008.1407
- 487 Brower, L. P., Brower, J. V. Z., & Collins, C. T. (1963). *Experimental studies of mimicry: Relative*  
488 *palatability and Müllerian mimicry among Neotropical butterflies of the subfamily*  
489 *Heliconiinae*. New York Zoological Society.
- 490 Brown, K. S. J. (1984). Chemical ecology of dehydropyrrolizidine alkaloids in adult  
491 Ithomiinae (Lepidoptera: Nymphalidae). *Revista Brasileira de Biologia*, 44(4), 435–460.
- 492 Brown, K. S. J. (1985). Chemical ecology of dehydropyrrolizidine alkaloids in adult Ithomiinae  
493 (Lepidoptera: Nymphalidae). *Rev. Bras. Biol.*, 44, 453–460.
- 494 Brown, K. S. J., & Neto, J. V. (1976). Predation on aposematic ithomiine butterflies by tanagers  
495 (Pipraeidea melanonota). *Biotropica*, 136–141.

- 496 Darst, C. R., Cummings, M. E., & Cannatella, D. C. (2006). A mechanism for diversity in warning  
497 signals: conspicuousness versus toxicity in poison frogs. *Proceedings of the National*  
498 *Academy of Sciences*, *103*(15), 5852–5857.
- 499 Davis, A. K., Chi, J., Bradley, C., & Altizer, S. (2012). The redder the better: wing color predicts  
500 flight performance in monarch butterflies. *PloS One*, *7*(7), e41323.
- 501 Elias, M., Gompert, Z., Jiggins, C., & Willmott, K. (2008). Mutualistic interactions drive ecological  
502 niche convergence in a diverse butterfly community. *PLoS Biology*, *6*(12), e300.
- 503 Endler, J. A. (1988). Frequency-dependent predation, crypsis and aposematic coloration. *Phil. Trans.*  
504 *R. Soc. Lond. B*, *319*(1196), 505–523.
- 505 Endler, J. A., & Mappes, J. (2004). Predator mixes and the conspicuousness of aposematic signals.  
506 *The American Naturalist*, *163*(4), 532–547.
- 507 Freitas, A. V. L., & Brown, K. S. (2004). Phylogeny of the Nymphalidae (Lepidoptera). *Systematic*  
508 *Biology*, *53*(3), 363–383.
- 509 Gamberale-Stille, G., Bragee, C., & Tullberg, B. S. (2009). Higher survival of aposematic prey in  
510 close encounters with predators: an experimental study of detection distance. *Animal*  
511 *Behaviour*, *78*(1), 111–116.
- 512 Gittleman, J. L., & Harvey, P. H. (1980). Why are distasteful prey not cryptic? *Nature*, *286*(5769),  
513 149–150. doi:10.1038/286149a0
- 514 Honma, A., Mappes, J., & Valkonen, J. K. (2015). Warning coloration can be disruptive: aposematic  
515 marginal wing patterning in the wood tiger moth. *Ecology and Evolution*, *5*(21), 4863–4874.
- 516 Ihalainen, E., Rowland, H. M., Speed, M. P., Ruxton, G. D., & Mappes, J. (2012). Prey community  
517 structure affects how predators select for Mullerian mimicry. *Proceedings of the Royal*  
518 *Society B-Biological Sciences*, *279*(1736), 2099–2105. doi:10.1098/rspb.2011.2360
- 519 Järvi, T., Sillén-Tullberg, B., & Wiklund, C. (1981). The cost of being aposematic. An experimental  
520 study of predation on larvae of *Papilio machaon* by the great tit *Parus major*. *Oikos*, 267–272.
- 521 Jiggins C. D., Estrada C., & Rodrigues A. (2004). Mimicry and the evolution of premating isolation in  
522 *Heliconius melpomene* Linnaeus. *Journal of Evolutionary Biology*, *17*(3), 680–691.  
523 doi:10.1111/j.1420-9101.2004.00675.x

- 524 Jiggins, C. D., Mallarino, R., Willmott, K. R., & Bermingham, E. (2006). The phylogenetic pattern of  
525 speciation and wing pattern change in neotropical *Ithomia* butterflies (Lepidoptera:  
526 Nymphalidae). *Evolution*, *60*(7), 1454–1466.
- 527 Johnsen, S. (2014). Hide and seek in the open sea: pelagic camouflage and visual countermeasures.  
528 *Annual Review of Marine Science*, *6*, 369–392.
- 529 Johnsen, S., & Widder, E. A. (1998). Transparency and visibility of gelatinous zooplankton from the  
530 northwestern Atlantic and Gulf of Mexico. *The Biological Bulletin*, *195*(3), 337–348.
- 531 Johnson, J. A., & Brodie Jr, E. D. (1975). The selective advantage of the defensive posture of the  
532 newt, *Taricha granulosa*. *American Midland Naturalist*, 139–148.
- 533 Kang, C., Zahiri, R., & Sherratt, T. N. (2017). Body size affects the evolution of hidden colour signals  
534 in moths. *Proc. R. Soc. B*, *284*(1861), 20171287.
- 535 Kerfoot, W. C. (1982). A question of taste: crypsis and warning coloration in freshwater zooplankton  
536 communities. *Ecology*, *63*(2), 538–554.
- 537 Langsdale, J. (1993). Developmental changes in the opacity of larval herring, *Clupea harengus*, and  
538 their implications for vulnerability to predation. *Journal of the Marine Biological Association*  
539 *of the United Kingdom*, *73*(1), 225–232.
- 540 Lindstrom, L., Alatalo, R. V., Mappes, J., Riipi, M., & Vertainen, L. (1999). Can aposematic signals  
541 evolve by gradual change? *Nature*, *397*(6716), 249–251. doi:10.1038/16692
- 542 Maan, M. E., & Cummings, M. E. (2012). Poison frog colors are honest signals of toxicity,  
543 particularly for bird predators. *The American Naturalist*, *179*(1), E1–E14.  
544 doi:10.1086/663197
- 545 Mallet, J., & Singer, M. C. (1987). Individual selection, kin selection, and the shifting balance in the  
546 evolution of warning colours: the evidence from butterflies. *Biological Journal of the Linnean*  
547 *Society*, *32*(4), 337–350.
- 548 Mappes, J., Kokko, H., Ojala, K., & Lindström, L. (2014). Seasonal changes in predator community  
549 switch the direction of selection for prey defences. *Nature Communications*, *5*.
- 550 Mappes, J., Marples, N., & Endler, J. A. (2005). The complex business of survival by aposematism.  
551 *Trends in Ecology & Evolution*, *20*(11), 598–603. doi:10.1016/j.tree.2005.07.011

- 552 Miaoulis, I. N., & Heilman, B. D. (1998). Butterfly thin films serve as solar collectors. *Annals of the*  
553 *Entomological Society of America*, *91*(1), 122–127.
- 554 Ödeen, A., Håstad, O., & Alström, P. (2011). Evolution of ultraviolet vision in the largest avian  
555 radiation - the passerines. *BMC Evolutionary Biology*, *11*(1), 313. doi:10.1186/1471-2148-11-  
556 313
- 557 Penney, H. D., Hassall, C., Skevington, J. H., Abbott, K. R., & Sherratt, T. N. (2012). A comparative  
558 analysis of the evolution of imperfect mimicry. *Nature*, *483*(7390), 461–464.
- 559 Pinheiro, C. E. G. (1996). Palatability and escaping ability in neotropical butterflies: Tests with wild  
560 kingbirds (*Tyrannus melancholicus*, Tyrannidae). *Biological Journal of the Linnean Society*,  
561 *59*(4), 351–365. doi:10.1111/j.1095-8312.1996.tb01471.x
- 562 Pinheiro, C. E., Medri, Í. M., & Salcedo, A. K. M. (2008). Why do the ithomiines (Lepidoptera,  
563 Nymphalidae) aggregate? Notes on a butterfly pocket in central Brazil. *Revista Brasileira de*  
564 *Entomologia*, *52*(4), 610–614.
- 565 Poulton, E. B. (1890). *The colours of animals: their meaning and use, especially considered in the*  
566 *case of insects*. D. Appleton.
- 567 Prudic, K. L., Skemp, A. K., & Papaj, D. R. (2007). Aposematic coloration, luminance contrast, and  
568 the benefits of conspicuousness. *Behavioral Ecology*, *18*(1), 41–46.  
569 doi:10.1093/beheco/arl046
- 570 R Foundation for Statistical Computing, R. C. (2014). *R: A language and environment for statistical*  
571 *computing*. Vienna, Austria.
- 572 Ruxton, G. D., Sherratt, T. N., & Speed, M. P. (2004). *Avoiding attack: the evolutionary ecology of*  
573 *crypsis, warning signals and mimicry*. Oxford University Press.
- 574 Sherratt, T. N., & Beatty, C. D. (2003). The evolution of warning signals as reliable indicators of prey  
575 defense. *The American Naturalist*, *162*(4), 377–389.
- 576 Sherratt, T. N., Whissell, E., Webster, R., & Kikuchi, D. W. (2015). Hierarchical overshadowing of  
577 stimuli and its role in mimicry evolution. *Animal Behaviour*, *108*, 73–79.
- 578 Sillén-Tullberg, B. (1985). Higher survival of an aposematic than of a cryptic form of a distasteful  
579 bug. *Oecologia*, *67*(3), 411–415. doi:10.1007/BF00384948

- 580 Speed, M. P., & Ruxton, G. D. (2007). How bright and how nasty: explaining diversity in warning  
581 signal strength. *Evolution*, *61*(3), 623–635.
- 582 Stevens, M., & Cuthill, I. C. (2006). Disruptive coloration, crypsis and edge detection in early visual  
583 processing. *Proceedings of the Royal Society B: Biological Sciences*, *273*(1598), 2141.  
584 doi:10.1098/rspb.2006.3556
- 585 Suzuki, T. K., Tomita, S., & Sezutsu, H. (2014). Gradual and contingent evolutionary emergence of  
586 leaf mimicry in butterfly wing patterns. *BMC Evolutionary Biology*, *14*(1), 229.  
587 doi:10.1186/s12862-014-0229-5
- 588 Tsuda, A., Hiroaki, S., & Hirose, T. (1998). Effect of gut content on the vulnerability of copepods to  
589 visual predation. *Limnology and Oceanography*, *43*(8), 1944–1947.
- 590 Tullberg, B. S., Merilaita, S., & Wiklund, C. (2005). Aposematism and crypsis combined as a result  
591 of distance dependence: functional versatility of the colour pattern in the swallowtail butterfly  
592 larva. *Proceedings of the Royal Society of London B: Biological Sciences*, *272*(1570), 1315–  
593 1321.
- 594 Valkonen, J. K., Nokelainen, O., Niskanen, M., Kilpimaa, J., Björklund, M., & Mappes, J. (2012).  
595 Variation in predator species abundance can cause variable selection pressure on warning  
596 signaling prey. *Ecology and Evolution*, *2*(8), 1971–1976.
- 597 Wanasekara, N. D., & Chalivendra, V. B. (2011). Role of surface roughness on wettability and  
598 coefficient of restitution in butterfly wings. *Soft Matter*, *7*(2), 373–379.
- 599 Wang, I. J. (2011). Inversely related aposematic traits: reduced conspicuousness evolves with  
600 increased toxicity in a polymorphic poison dart frog. *Evolution: International Journal of*  
601 *Organic Evolution*, *65*(6), 1637–1649.
- 602 Watson, G. S., Myhra, S., Cribb, B. W., & Watson, J. A. (2008). Putative functions and functional  
603 efficiency of ordered cuticular nanoarrays on insect wings. *Biophysical Journal*, *94*(8), 3352–  
604 3360.
- 605 Willink, B., Brenes-Mora, E., Bolaños, F., & Pröhl, H. (2013). Not everything is black and white:  
606 color and behavioral variation reveal a continuum between cryptic and aposematic strategies  
607 in a polymorphic poison frog. *Evolution*, *67*(10), 2783–2794.



608 Willmott, K. R., Willmott, J. C. R., Elias, M., & Jiggins, C. D. (2017). Maintaining mimicry diversity:  
609 optimal warning colour patterns differ among microhabitats in Amazonian clearwing  
610 butterflies (Vol. 284, p. 20170744). Presented at the Proc. R. Soc. B, The Royal Society.

611 Yoshida, A., Motoyama, M., Kosaku, A., & Miyamoto, K. (1997). Antireflective nanoprotuberance  
612 array in the transparent wing of a hawkmoth, *Cephonodes hylas*. *Zoological Science*, *14*(5),  
613 737–741.

614 Zaret, T. M. (1972). Predators, invisible prey, and the nature of polymorphism in the cladocera (class  
615 Crustacea). *Limnology and Oceanography*, *17*(2), 171–184. doi:10.4319/lo.1972.17.2.0171  
616  
617  
618  
619  
620  
621  
622  
623  
624  
625  
626  
627  
628  
629  
630  
631  
632  
633  
634  
635

636

637

638

639 **Figures**

640

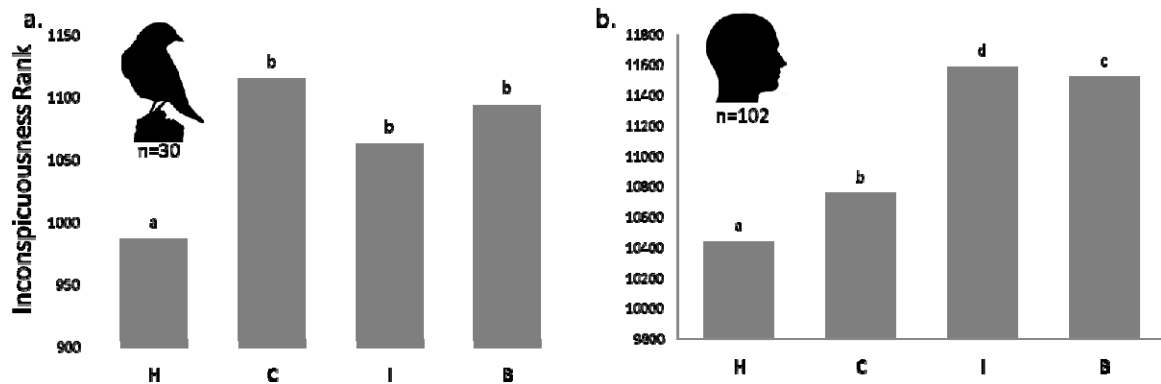

641

642 Figure 1. Sum of the inconspicuousness rank of each species for a) great tits and b) humans.

643 Species for which butterflies were detected first and most often by birds or humans have

644 lower values of “inconspicuousness rank”. Butterfly transparency increases from left to right:

645 *H. ninonia* (H), *C. tutia* (C), *I. salapia* (I), and *B. seba* (B). Letters above the bars mean

646 significant differences below 0.05.

647

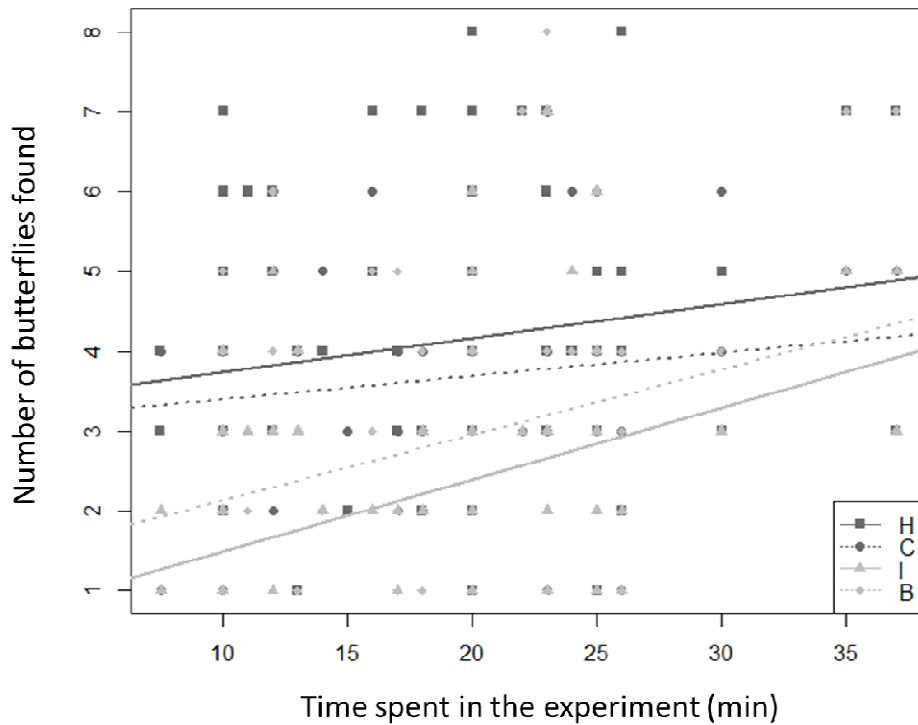

648  
649

650 Figure 2. Number of butterflies found for each species according to the time spent completing  
651 the experiment by human participants. As shown by the regression lines, spending more time  
652 on the experiment resulted in higher numbers of butterflies found, especially for the  
653 transparent species (H: estimate slope= 0.043,  $r^2 = 0.014$ ,  $p = 0.12$ ; C: estimate slope= 0.03,  $r^2$   
654 = 0.005,  $p = 0.22$ ; I: estimate slope= 0.090,  $r^2 = 0.12$ ,  $p < 0.001$ ; B: estimate slope= 0.08,  $r^2 =$   
655 0.07,  $p = 0.003$ ). Letters in the legend stand for species names: *H.ninonia* (H), *C.tutia* (C), *I.*  
656 *salapia* (I), and *B. seba* (B). Butterfly transparency increases from top to bottom of the legend  
657 (i.e. H<C<I<B).

658  
659
